# Supplementary material for: Polarized emission effect realized in CH3NH3PbI3 perovskite nanocrystals
Source: Royal Society of Chemistry journal article supplement (doi:10.1039/c7tc03104a), 2017-01-01
Supplement: c7tc03104a1.pdf [file c7tc03104a1.pdf]

## Supporting Information

# Polarized emission effect realized in $\text{CH}_3\text{NH}_3\text{PbI}_3$ perovskite nanocrystals

*Zhi-Feng Shi,\* Ying Li, Sen Li, Hui-Fang Ji, Ling-Zhi Lei, Di Wu, Ting-Ting Xu, Jun-Min Xu,  
Yong-Tao Tian and Xin-Jian Li\**

Key Laboratory of Materials Physics of Ministry of Education, Zhengzhou University, Daxue  
Road 75, Zhengzhou 450052, China

### Corresponding Author

\*E-mail: (Z.S.) [shizf@zzu.edu.cn](mailto:shizf@zzu.edu.cn).

\*E-mail: (X.L.) [lixj@zzu.edu.cn](mailto:lixj@zzu.edu.cn).

## Temperature-dependent XRD patterns of $\text{CH}_3\text{NH}_3\text{PbI}_3$ NCs

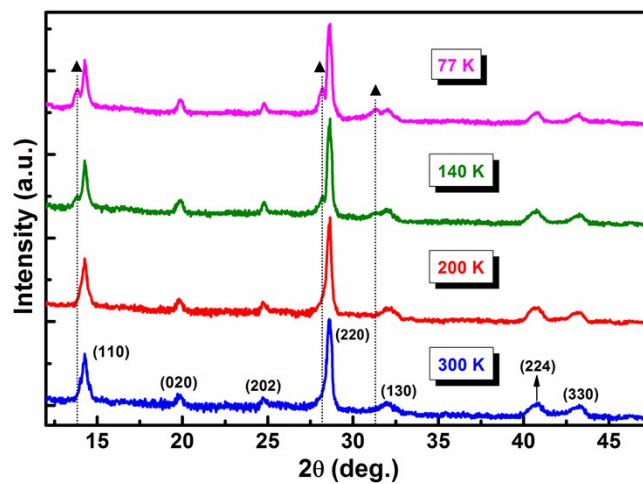

**Figure S1.** XRD patterns of the  $\text{CH}_3\text{NH}_3\text{PbI}_3$  NCs film performed at four typical temperature points.

## Charge-carrier transfer and recombination model in $\text{CH}_3\text{NH}_3\text{PbI}_3$ NCs

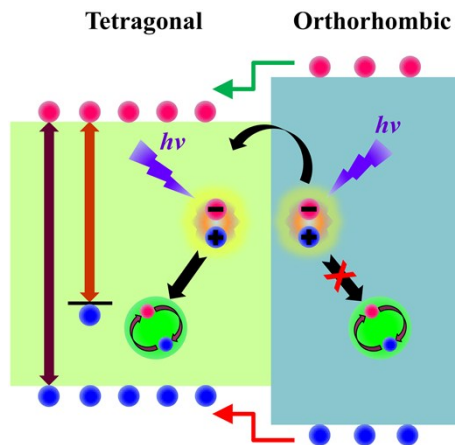

**Figure S2.** The charge-carrier transfer and recombination model in  $\text{CH}_3\text{NH}_3\text{PbI}_3$  NCs film at low temperatures.
